# Supplementary material
Source: publisher figshare collection journal article supplement (https://acs.figshare.com/ndownloader/files/13889795)
Supplement: Supplementary file 1 [file 13889795]

## Sheet: KiNativ Results
Kinase(s)	Reference	Sequence	Labeling Site	1 µM JZ128		Labeling Site Key
PIP4K2C	UniRef100_Q8TBX8, UniRef100_O88370, UniRef100_Q0P5F7, UniRef100_Q91XU3, UniRef100_UPI000490C11F, UniRef100_F1PA10, UniRef100_UPI0001CE1E41, UniRef100_G1SEB8	TLVIKEVSSEDIADMHSNLSNYHQYIVK	ATP	80.8111		Lys1	Conserved Lysine 1
PIP4K2C	UniRef100_Q8TBX8, UniRef100_O88370, UniRef100_Q0P5F7, UniRef100_Q91XU3, UniRef100_UPI000490C11F, UniRef100_F1PA10, UniRef100_UPI0001CE1E41, UniRef100_G1SEB8	VKELPTLKDMDFLNK	ATP	75.8518		Lys2	Conserved Lysine 2
RIPK2	UniRef100_P58801, UniRef100_G3V783, UniRef100_Q3SZJ2, UniRef100_E2QUD1, UniRef100_O43353	ILHEIALGVNYLHNMTPPLLHHDLKTQNILLDNEFHVK	Lys2	56.1816		ATP Loop	ATP binding loop
PIP5K3 (PIKFYVE)	UniRef100_D3ZT14, UniRef100_Q9Z1T6, UniRef100_UPI0003ADAD9E, UniRef100_G1SI28, UniRef100_Q9Y2I7, UniRef100_D3ZYT8, UniRef100_UPI0004918EB8, UniRef100_UPI0000EBC4FC	GGKSGAAFYATEDDRFILK	ATP	45.8748		Activation Loop	Activation loop
RIPK2	UniRef100_P58801, UniRef100_G3V783, UniRef100_Q3SZJ2, UniRef100_E2QUD1, UniRef100_O43353	VQVAVKHLHIHTPLLDSER	Lys1	34.8974		ATP	ATP site in non-canonical kinase (e.g. lipid kinase)
MARK4	UniRef100_Q96L34, UniRef100_UPI00023ADE16, UniRef100_Q8CIP4, UniRef100_F1N7E8, UniRef100_D4A6T9	DLKAENLLLDAEANIK	Lys2	28.0737		Protein Kinase Domain	Other lysine within kinase domain, possibly not in ATP binding site
IRAK1	UniRef100_P51617, UniRef100_Q62406, UniRef100_Q2LGB3, UniRef100_B2RYH5, UniRef100_E2QX24	AIQFLHQDSPSLIHGDIKSSNVLLDER	Lys2	24.8321		Other	Labeling of residue outside of the protein kinase domain, possibly not in ATP binding site
HER3/ErbB3	UniRef100_F1PVC5, UniRef100_Q61526, UniRef100_P21860, UniRef100_Q62799, UniRef100_A6QR62	GVWIPEGESIKIPVCIKVIEDK	Lys1	22.7417
CaMK1d	UniRef100_UPI00048C7C30, UniRef100_Q8BW96, UniRef100_UPI0003840147, UniRef100_UPI00048FAD0F, UniRef100_G1T1N2, UniRef100_F1PD00, UniRef100_UPI0001CE2969, UniRef100_Q8IU85	LFAVKCIPK	Lys1	20.5831
SRPK1	UniRef100_Q4KLN3, UniRef100_O70551, UniRef100_Q96SB4, UniRef100_E1BNV4, UniRef100_E2RL63	IIHTDIKPENILLSVNEQYIR	Lys2	20.4673			>90% Inhibition
ACK	UniRef100_Q07912, UniRef100_E2RFP7, UniRef100_UPI00048B64C5, UniRef100_O54967, UniRef100_F1MSL0, UniRef100_G1SVN8, UniRef100_Q5U2X5	KVPFAWCAPESLK	Activation Loop	20.2102			75 - 90% Inhibition
GSK3B	UniRef100_G1T8E2, UniRef100_E2RB53, UniRef100_UPI00048E469E, UniRef100_UPI00048B6D85, UniRef100_P18266, UniRef100_Q9WV60, UniRef100_P49841, UniRef100_UPI00048BC575, UniRef100_I3MNZ2	DIKPQNLLLDPDTAVLK	Lys2	19.0048			50 - 75% Inhibition
IKKa	UniRef100_Q60680, UniRef100_G1T4S2, UniRef100_Q95KV1, UniRef100_E2RNA9, UniRef100_UPI00048EDB37, UniRef100_O15111, UniRef100_G3V926	DLKPENIVLQDVGGK	Lys2	18.3676			35 - 50% Inhibition
MASTL	UniRef100_D4A355, UniRef100_E2RJI4, UniRef100_Q8C0P0, UniRef100_G5E5K2, UniRef100_Q96GX5	LYAVKVVK	Lys1	18.345			No change
AurA	UniRef100_O14965, UniRef100_UPI00005A4587, UniRef100_Q2TA06, UniRef100_P97477, UniRef100_P59241	DIKPENLLLGSAGELK	Lys2	16.5915			>100% increase in MS signal (>2 fold increase)
MAP3K5	UniRef100_D3ZZH6, UniRef100_Q99683, UniRef100_UPI00017C2F16, UniRef100_O35099, UniRef100_F1PA02	DIKGDNVLINTYSGVLK	Lys2	16.2186		ND	Not determined
ZC2/TNIK	UniRef100_D3ZZQ0, UniRef100_P83510, UniRef100_Q9UKE5, UniRef100_F1PPZ5, UniRef100_UPI00017C2C93	TGQLAAIKVMDVTGDEEEEIKQEINMLKK	Lys1	15.6752		Data points inhibited >35% & not considered significant are left uncolored
CDK2	UniRef100_Q5E9Y0, UniRef100_P24941, UniRef100_Q63699, UniRef100_Q3U6X7, UniRef100_E2QW70, UniRef100_P97377, UniRef100_G1U4R9	DLKPQNLLINTEGAIK	Lys2	15.5421
TAK1	UniRef100_Q62073, UniRef100_G1SFY3, UniRef100_UPI0001CE2599, UniRef100_A2VDU3, UniRef100_O43318, UniRef100_UPI0001CE259A, UniRef100_P0C8E4	DLKPPNLLLVAGGTVLK	Lys2	15.4374
ZAK	UniRef100_E2REE9, UniRef100_UPI0001CE0AC4, UniRef100_Q9NYL2, UniRef100_UPI00048D943A, UniRef100_D4AE17, UniRef100_UPI000490B0C0, UniRef100_G1T8M6, UniRef100_Q9ESL4, UniRef100_UPI00017C2D6B	WISQDKEVAVKK	Lys1	14.3583
HER2/ErbB2	UniRef100_P04626, UniRef100_P06494, UniRef100_P70424, UniRef100_O18735, UniRef100_UPI00023AD1E5	GIWIPDGENVKIPVAIKVLR	Lys1	14.1783
NEK7	UniRef100_E1BDZ2, UniRef100_Q8TDX7, UniRef100_Q9ES74, UniRef100_D3ZBE5, UniRef100_E2R2U0	AACLLDGVPVALKK	Lys1	13.6387
ANKRD3	UniRef100_A6QLV0, UniRef100_Q9ERK0, UniRef100_F1P9D4, UniRef100_D4AAK5, UniRef100_P57078	TWLAIKCSPSLHVDDR	Lys1	13.4333
GSK3A	UniRef100_UPI0001CE1892, UniRef100_P49840, UniRef100_A6QLB8, UniRef100_UPI00048FBFF3, UniRef100_P18265, UniRef100_Q2NL51, UniRef100_UPI000059FE5F, UniRef100_G1U0J7	DIKPQNLLVDPDTAVLK	Lys2	12.9656
CaMK1a	UniRef100_G1TI79, UniRef100_UPI0001CE1F93, UniRef100_Q08DQ1, UniRef100_Q14012, UniRef100_E2QWM5, UniRef100_Q91YS8, UniRef100_Q63450, UniRef100_UPI00048D7EE4	LVAIKCIAK	Lys1	12.5247
MAP2K1, MAP2K2	UniRef100_P31938, UniRef100_J9P5W6, UniRef100_Q1HG70, UniRef100_Q01986, UniRef100_P36507, UniRef100_P36506, UniRef100_Q17QH2, UniRef100_P29678, UniRef100_G1SVV6, UniRef100_Q63932, UniRef100_Q7M3J2, UniRef100_Q02750	KLIHLEIKPAIR	Lys1	12.2771
TLK1	UniRef100_D3ZXW7, UniRef100_Q8C0V0, UniRef100_UPI0003D0AFF0, UniRef100_UPI0001CE0A07, UniRef100_UPI00017C2ACD, UniRef100_Q9UKI8, UniRef100_F1PUB2, UniRef100_G1T3V4	YAAVKIHQLNK	Lys1	12.2573
ILK	UniRef100_L8YC71, UniRef100_Q13418, UniRef100_O55222, UniRef100_E2R5H4, UniRef100_Q3SWY2	WQGNDIVVKVLK	Lys1	12.2051
PDK1	UniRef100_F1Q2Y3, UniRef100_F1MA54, UniRef100_Q9Z2A0, UniRef100_Q63065, UniRef100_Q5FVT5, UniRef100_UPI000383B01D, UniRef100_O15530, UniRef100_O55173	EYAIKILEK	Lys1	12.1344
CHK2	UniRef100_Q58DJ9, UniRef100_G1TF11, UniRef100_O96017, UniRef100_UPI0001CE1742, UniRef100_Q9R019, UniRef100_UPI00048F6AD0, UniRef100_E2QU88, UniRef100_Q9Z265	DLKPENVLLSSQEEDCLIK	Lys2	11.5965
CLK2	UniRef100_P49760, UniRef100_F1P919, UniRef100_Q5XI98, UniRef100_O35491, UniRef100_UPI000383DC3A	LTHTDLKPENILFVNSDYELTYNLEK	Lys2	11.579
MAP2K7	UniRef100_O14733, UniRef100_UPI00005A3D52, UniRef100_Q8CE90, UniRef100_Q4KSH7, UniRef100_UPI00048BCBB8, UniRef100_G1TL77, UniRef100_UPI00048CAD9B, UniRef100_F1N664	DVKPSNILLDER	Lys2	11.5552
MLK3	UniRef100_Q66HA1, UniRef100_Q16584, UniRef100_F1MC61, UniRef100_G1T535, UniRef100_Q80XI6, UniRef100_F1PAC5	GELVAVKAAR	Lys1	11.5491
NEK6, NEK7	UniRef100_G1T198, UniRef100_A6H7J4, UniRef100_E1BDZ2, UniRef100_Q8TDX7, UniRef100_J9NX17, UniRef100_Q9ES74, UniRef100_Q9HC98, UniRef100_Q9ES70, UniRef100_D3ZBE5, UniRef100_G1SWK1, UniRef100_E2R2U0, UniRef100_P59895	DIKPANVFITATGVVK	Lys2	11.3833
MASTL	UniRef100_D4A355, UniRef100_E2RJI4, UniRef100_Q8C0P0, UniRef100_G5E5K2, UniRef100_Q96GX5	GAFGKVYLGQK	ATP Loop	11.3254
ILK	UniRef100_L8YC71, UniRef100_Q13418, UniRef100_O55222, UniRef100_E2R5H4, UniRef100_Q3SWY2	ISMADVKFSFQCPGR	Protein Kinase Domain	11.2173
CaMKK2	UniRef100_Q96RR4, UniRef100_O88831, UniRef100_UPI00048F0184, UniRef100_Q148H3, UniRef100_G1U863, UniRef100_UPI00048FFBD1, UniRef100_Q8C078, UniRef100_UPI00048F9570, UniRef100_E2R3S0, UniRef100_UPI00048CD973	LAYNENDNTYYAMKVLSK	Lys1	11.0057
ABL, ARG	UniRef100_Q4JIM5, UniRef100_F1PEX7, UniRef100_G1U0I1, UniRef100_UPI00005BE701, UniRef100_G1SVS3, UniRef100_UPI00005825F8, UniRef100_F1M0A6, UniRef100_UPI00005A1353, UniRef100_P42684, UniRef100_P00519, UniRef100_UPI0001CE24E0, UniRef100_UPI000491F5FB, UniRef100_P00520, UniRef100_UPI0001CE24DF, UniRef100_G1SSF7, UniRef100_Q2PYT3, UniRef100_UPI0001CE24DE, UniRef100_UPI00048D9B48, UniRef100_UPI00048C…	YSLTVAVKTLKEDTMEVEEFLK	Lys1	10.9499
CaMKK1	UniRef100_P97756, UniRef100_Q8N5S9, UniRef100_Q8VBY2, UniRef100_UPI0000EBDC07, UniRef100_E2R3M4	DIKPSNLLLGDDGHVK	Lys2	10.9455
PFTAIRE1	UniRef100_G1TVZ7, UniRef100_UPI0003D07A8E, UniRef100_D3ZSZ0, UniRef100_UPI0001C60F17, UniRef100_B6A7Q3, UniRef100_E2RG46, UniRef100_G1SWT4, UniRef100_O94921, UniRef100_UPI0000EBC6E4, UniRef100_UPI00048D0658, UniRef100_O35495	DLKPQNLLISDTGELK	Lys2	10.6986
FAK	UniRef100_O35346, UniRef100_P34152, UniRef100_UPI00048B5B9F, UniRef100_E2RGP8, UniRef100_UPI0001CE19C8, UniRef100_UPI0001C4E0EC, UniRef100_G1TS73, UniRef100_Q05397	CIGEGQFGDVHQGIYMSPENPALAVAIKTCK	Lys1	10.6
CDK7	UniRef100_P50613, UniRef100_Q03147, UniRef100_G1ST86, UniRef100_E2R8R2, UniRef100_P51952	DLKPNNLLLDENGVLK	Lys2	10.5178
NEK9	UniRef100_UPI000154F746, UniRef100_E2QYP0, UniRef100_UPI0000EBD2CC, UniRef100_Q8TD19, UniRef100_Q8K1R7, UniRef100_UPI0001CE1500, UniRef100_G1SYU0	RTEDDSLVVWKEVDLTR	Lys1	10.2892
PDHK1	UniRef100_Q15118, UniRef100_E1B8C5, UniRef100_G1SD87, UniRef100_F1PAD3	SPGQPIQVVYVPSHLYHMVFELFKNAMR	ATP	9.92637
MARK2, MARK3	UniRef100_Q05512, UniRef100_P27448, UniRef100_UPI00048BC37F, UniRef100_O08679, UniRef100_G1TFJ2, UniRef100_UPI000383E922, UniRef100_G1TC47, UniRef100_Q7KZI7, UniRef100_Q8VHF0, UniRef100_UPI00048AE882, UniRef100_UPI00005A18F5, UniRef100_Q03141, UniRef100_UPI00048D35F2, UniRef100_UPI0004905773, UniRef100_UPI00048C42B6, UniRef100_UPI00048CFEF6, UniRef100_A6QNL2, UniRef100_UPI0003AD8C49, UniRef100_UP…	DLKAENLLLDADMNIK	Lys2	9.90983
BCKDK	UniRef100_O14874, UniRef100_F6V080, UniRef100_Q00972, UniRef100_Q2KJG8	FPFIPMPLDYILPELLKNAMR	ATP	9.50445
FRK	UniRef100_E1BPI3, UniRef100_F1PR52, UniRef100_Q922K9, UniRef100_Q62662, UniRef100_P42685	HEIKLPVK	Activation Loop	9.23702
STLK3	UniRef100_UPI0003AE4792, UniRef100_O88506, UniRef100_Q9UEW8, UniRef100_G1TEM4, UniRef100_Q9Z1W9, UniRef100_Q32LA8, UniRef100_UPI0001CE092C	DLKAGNILLGEDGSVQIADFGVSAFLATGGDVTR	Lys2	9.18413
CRK7	UniRef100_UPI0000EBDE08, UniRef100_E2R9H9, UniRef100_Q3MJK5, UniRef100_Q14AX6, UniRef100_Q9NYV4	DIKCSNILLNNSGQIK	Lys2	9.16494
EphB4	UniRef100_UPI0000F30695, UniRef100_P54760, UniRef100_UPI0000DA38F6, UniRef100_P54761, UniRef100_F1PRQ8	FLEENSSDPTYTSSLGGKIPIR	Activation Loop	9.03013
CaMK2d	UniRef100_P15791, UniRef100_E2RR74, UniRef100_Q13557, UniRef100_Q2HJF7	IPTGQEYAAKIINTKK	Lys1	8.97674
Erk1	UniRef100_UPI0001CE06B5, UniRef100_UPI00048AF3F3, UniRef100_P27361, UniRef100_P21708, UniRef100_Q63844, UniRef100_E1B8P9, UniRef100_UPI00022F83B7, UniRef100_G1T5Z7	DLKPSNLLINTTCDLK	Lys2	8.84683
MAP3K4	UniRef100_E2R9L4, UniRef100_UPI00048A7200, UniRef100_Q9Y6R4, UniRef100_D3ZGU6, UniRef100_O08648, UniRef100_UPI0001CE23F0, UniRef100_UPI000383E5A1, UniRef100_G1TD48	VYTCISVDTGELMAMKEIR	Lys1	8.71915
JNK1, JNK2, JNK3	UniRef100_UPI0000E30DA0, UniRef100_G1TPJ7, UniRef100_Q61831, UniRef100_Q91Y86, UniRef100_UPI000490335B, UniRef100_G1SZR5, UniRef100_F1PMN2, UniRef100_E2R9W9, UniRef100_P45983, UniRef100_J3KNK1, UniRef100_P53779, UniRef100_P45984, UniRef100_UPI000383BBD0, UniRef100_F1P630, UniRef100_Q9WTU6, UniRef100_UPI00005A22E2, UniRef100_G1T9N9, UniRef100_P49187, UniRef100_P49186, UniRef100_P49185	DLKPSNIVVK	Lys2	8.63225
PKN2	UniRef100_O08874, UniRef100_Q8BWW9, UniRef100_F1MFK1, UniRef100_F1PHU4, UniRef100_G1TCY1, UniRef100_Q16513, UniRef100_F1LPA4, UniRef100_UPI0001CE2DCC	DLKLDNLLLDTEGFVK	Lys2	8.62543
MAP3K3	UniRef100_B5DF98, UniRef100_Q61084, UniRef100_F1P750, UniRef100_Q99759, UniRef100_UPI00023AD94E	ELASKQVQFDPDSPETSKEVSALECEIQLLK	Lys1	8.4697
Erk5	UniRef100_UPI000225780A, UniRef100_Q13164, UniRef100_P0C865, UniRef100_Q9WVS8, UniRef100_A5PKJ4, UniRef100_G1U050, UniRef100_G1T8U7	DLKPSNLLVNENCELK	Lys2	8.43638
MAP2K6	UniRef100_Q925D6, UniRef100_E2R7W7, UniRef100_P70236, UniRef100_UPI0001CE1F0F, UniRef100_P52564, UniRef100_L5KNH7, UniRef100_Q5E9X2, UniRef100_G1STE8	DVKPSNVLINALGQVK	Lys2	8.26137
ZC1/HGK, ZC2/TNIK, ZC3/MINK	UniRef100_P97820, UniRef100_O95819, UniRef100_UPI00048FEB35, UniRef100_D3ZZQ0, UniRef100_P83510, UniRef100_G1SYU6, UniRef100_UPI00048A4BD5, UniRef100_Q8N4C8, UniRef100_UPI00017C2C93, UniRef100_F1PZ09, UniRef100_UPI0001CE0BF9, UniRef100_UPI00048B54E7, UniRef100_UPI00048BD09B, UniRef100_UPI0001CE0CA7, UniRef100_UPI0001CE0BFA, UniRef100_A6H7I9, UniRef100_F1M754, UniRef100_G1SM46, UniRef100_F1PPZ5, U…	DIKGQNVLLTENAEVK	Lys2	8.09696
CaMK2a, CaMK2b, CaMK2d, CaMK2g	UniRef100_G1TEL6, UniRef100_UPI00048EDF8E, UniRef100_P28652, UniRef100_UPI000383D0C3, UniRef100_Q3MHJ9, UniRef100_Q923T9, UniRef100_E2RR74, UniRef100_P11730, UniRef100_G1TVE5, UniRef100_O77708, UniRef100_Q2HJF7, UniRef100_Q9UQM7, UniRef100_Q53H78, UniRef100_P15791, UniRef100_G1U0Y0, UniRef100_P11798, UniRef100_O77707, UniRef100_O77706, UniRef100_E2RG57, UniRef100_UPI00005A0756, UniRef100_P08413, …	LYQQIKAGAYDFPSPEWDTVTPEAK	Protein Kinase Domain	8.00885
MARK3	UniRef100_Q03141, UniRef100_UPI00005A18F5, UniRef100_P27448, UniRef100_UPI00048D35F2, UniRef100_UPI0004905773, UniRef100_UPI00048BC37F, UniRef100_G1TFJ2, UniRef100_UPI000383E922, UniRef100_G1T4C5, UniRef100_Q8VHF0	EVAIKIIDKTQLNPTSLQK	Lys1	7.98265
PITSLRE	UniRef100_P24788, UniRef100_E2R4W7, UniRef100_G1STM7, UniRef100_P46892, UniRef100_F1N5K1, UniRef100_P21127, UniRef100_D3ZML3, UniRef100_UPI0001CE17BC	DLKTSNLLLSHAGILK	Lys2	7.76269
Wnk1, Wnk2, Wnk3	UniRef100_Q9Y3S1, UniRef100_UPI00048ED2C3, UniRef100_Q9JIH7, UniRef100_UPI00048AE3CC, UniRef100_Q7TPK6, UniRef100_G1T5N9, UniRef100_UPI00048FE3C7, UniRef100_UPI0001CE1710, UniRef100_UPI0004917F20, UniRef100_UPI0001CE1711, UniRef100_UPI00048FE1A2, UniRef100_UPI00048DD7D4, UniRef100_UPI000383C92B, UniRef100_G1T1M3, UniRef100_UPI0004921BE6, UniRef100_UPI0003AD9196, UniRef100_UPI0003AE74AE, UniRef100…	DLKCDNIFITGPTGSVK	Lys2	7.52332
GCN2 domain2	UniRef100_UPI00049159CD, UniRef100_UPI00048BE1B1, UniRef100_D4A7V9, UniRef100_Q9QZ05, UniRef100_Q9P2K8, UniRef100_E2RS10, UniRef100_G1SR58, UniRef100_UPI000383ED47	DLKPVNIFLDSDDHVK	Lys2	7.38926
LKB1	UniRef100_UPI00005A3E78, UniRef100_UPI0000DA2C54, UniRef100_UPI000383BA9D, UniRef100_Q15831, UniRef100_Q9WTK7	DIKPGNLLLTTGGTLK	Lys2	7.38443
MARK1, MARK2	UniRef100_Q05512, UniRef100_J9P3Y6, UniRef100_G1T4U0, UniRef100_Q8VHJ5, UniRef100_O08678, UniRef100_G1TLC6, UniRef100_O08679, UniRef100_G1TC47, UniRef100_Q7KZI7, UniRef100_G5E5D4, UniRef100_UPI00048AAED0, UniRef100_UPI00048AE882, UniRef100_UPI00048CFEF6, UniRef100_UPI00048C42B6, UniRef100_A6QNL2, UniRef100_UPI0001CE2080, UniRef100_UPI0003AD8C49, UniRef100_UPI00048EE471, UniRef100_UPI0001CE2377, U…	EVAVKIIDK	Lys1	7.32378
STLK6	UniRef100_F1MB87, UniRef100_Q8K4T3, UniRef100_F1PQ92, UniRef100_D3ZVH0, UniRef100_Q9C0K7	HTPTGTLVTIKITNLENCNEER	Lys1	7.16462
RON	UniRef100_UPI000017ED6E, UniRef100_UPI0000EBE07B, UniRef100_Q6DTW4, UniRef100_Q04912, UniRef100_Q62190	VIGKGHFGVVYHGEYIDQAQNR	ATP Loop	7.04332
CLK3	UniRef100_Q3SX21, UniRef100_P49761, UniRef100_Q63117, UniRef100_UPI000490C5AA, UniRef100_O35492, UniRef100_E2RGH3, UniRef100_G1TEB6	YEIVGNLGEGTFGKVVECLDHAR	ATP Loop	7.03444
MLK3	UniRef100_Q66HA1, UniRef100_Q16584, UniRef100_F1MC61, UniRef100_G1T535, UniRef100_Q80XI6, UniRef100_F1PAC5	DLKSNNILLLQPIESDDMEHK	Lys2	6.97677
Wnk1, Wnk2, Wnk4	UniRef100_Q9Y3S1, UniRef100_Q96J92, UniRef100_E2RNS7, UniRef100_UPI00048ED2C3, UniRef100_Q9JIH7, UniRef100_UPI00048AE3CC, UniRef100_Q7TPK6, UniRef100_G1T5N9, UniRef100_UPI00048FE3C7, UniRef100_UPI0001CE1710, UniRef100_UPI0004917F20, UniRef100_UPI0001CE1711, UniRef100_UPI00048FE1A2, UniRef100_UPI00048DD7D4, UniRef100_UPI000383C92B, UniRef100_G1T1M3, UniRef100_UPI0004921BE6, UniRef100_UPI0003AE74AE…	IGDLGLATLKR	Activation Loop	6.53178
MAPKAPK3	UniRef100_Q3SYZ2, UniRef100_Q66H84, UniRef100_F1PU32, UniRef100_Q16644, UniRef100_Q3UMW7, UniRef100_G1SNN9	QVLGLGVNGKVLECFHR	ATP Loop	6.52895
CaMK2g	UniRef100_UPI000383D0C3, UniRef100_Q923T9, UniRef100_P11730, UniRef100_UPI00005A0756, UniRef100_Q13555	TSTQEYAAKIINTK	Lys1	6.47701
MLK1	UniRef100_UPI000383C62A, UniRef100_P80192, UniRef100_F1LRA7, UniRef100_Q3U1V8, UniRef100_F1P626	DLKSSNILILQK	Lys2	6.44608
ZC1/HGK	UniRef100_P97820, UniRef100_O95819, UniRef100_UPI00048FEB35, UniRef100_G1SYU6, UniRef100_UPI00038404DB, UniRef100_UPI00048A4BD5, UniRef100_UPI0000DA329A, UniRef100_UPI0001CE0BF9, UniRef100_UPI00048B54E7, UniRef100_UPI00048C7403, UniRef100_UPI00048BD09B, UniRef100_G1SUP1, UniRef100_UPI00048C3115, UniRef100_UPI0001CE0CA7, UniRef100_UPI00048CB325, UniRef100_UPI0001CE0BFA, UniRef100_F1M754, UniRef100…	TGQLAAIKVMDVTEDEEEEIKLEINMLKK	Lys1	6.38108
CDC2	UniRef100_Q5H9N4, UniRef100_P48734, UniRef100_G1SIH0, UniRef100_P39951, UniRef100_E2RGJ9, UniRef100_P11440	KPLFHGDSEIDQLFR	Protein Kinase Domain	6.33374
CLK3	UniRef100_Q3SX21, UniRef100_P49761, UniRef100_Q63117, UniRef100_UPI000490C5AA, UniRef100_O35492, UniRef100_E2RGH3, UniRef100_G1TEB6	FLHENQLTHTDLKPENILFVNSEFETLYNEHK	Lys2	6.33204
PI4KB	UniRef100_O08561, UniRef100_Q8BKC8, UniRef100_F1PPB7, UniRef100_F1MXI2, UniRef100_U3KP92, UniRef100_UPI00048BFF8D, UniRef100_B7NZD4, UniRef100_Q9UBF8, UniRef100_UPI0004907BB6, UniRef100_G1SHW1	LLSVIVKCGDDLRQELLAFQVLK	ATP	6.11999
MARK2	UniRef100_Q05512, UniRef100_O08679, UniRef100_G1TC47, UniRef100_Q7KZI7, UniRef100_UPI00048AE882, UniRef100_UPI00048CFEF6, UniRef100_UPI00048C42B6, UniRef100_A6QNL2, UniRef100_UPI0001CE2080, UniRef100_UPI0003AD8C49, UniRef100_UPI0001CE2082, UniRef100_UPI00048F6B0C, UniRef100_UPI0001CE2081	EVAVKIIDKTQLNSSSLQK	Lys1	5.96132
Erk3	UniRef100_P27704, UniRef100_G5E577, UniRef100_UPI00004A6FAC, UniRef100_Q16659, UniRef100_Q61532	DLKPANLFINTEDLVLK	Lys2	5.92048
IKKe	UniRef100_UPI00048B452C, UniRef100_UPI0001CE25FC, UniRef100_G1T2P2, UniRef100_U3KNT8, UniRef100_D4A5E7, UniRef100_Q14164, UniRef100_Q29RL5, UniRef100_UPI00049016BB, UniRef100_Q9R0T8, UniRef100_G1T9F4, UniRef100_E2RAF7	SGELVAVKVFNTTSYLRPR	Lys1	5.87634
CaMKK2	UniRef100_Q96RR4, UniRef100_O88831, UniRef100_UPI00048F0184, UniRef100_Q148H3, UniRef100_G1U863, UniRef100_UPI00048FFBD1, UniRef100_Q8C078, UniRef100_UPI00048F9570, UniRef100_E2R3S0, UniRef100_UPI00048CD973	DIKPSNLLVGEDGHIK	Lys2	5.65583
PFTAIRE1	UniRef100_G1TVZ7, UniRef100_UPI0003D07A8E, UniRef100_D3ZSZ0, UniRef100_UPI0001C60F17, UniRef100_B6A7Q3, UniRef100_E2RG46, UniRef100_G1SWT4, UniRef100_O94921, UniRef100_UPI0000EBC6E4, UniRef100_UPI00048D0658, UniRef100_O35495	LVALKVIR	Lys1	5.606
MARK3, MARK4	UniRef100_P27448, UniRef100_UPI00048BC37F, UniRef100_G1TFJ2, UniRef100_UPI000383E922, UniRef100_Q8CIP4, UniRef100_Q8VHF0, UniRef100_Q96L34, UniRef100_UPI00005A18F5, UniRef100_Q03141, UniRef100_UPI00048D35F2, UniRef100_UPI0004905773, UniRef100_G1T4C5, UniRef100_UPI00023ADE16, UniRef100_F1N7E8, UniRef100_D4A6T9	EVAIKIIDK	Lys1	5.5396
ACK	UniRef100_Q07912, UniRef100_E2RFP7, UniRef100_UPI00048B64C5, UniRef100_O54967, UniRef100_F1MSL0, UniRef100_G1SVN8, UniRef100_Q5U2X5	TVSVAVKCLKPDVLSQPEAMDDFIR	Lys1	5.28369
CaMK2a, CaMK2b, CaMK2d, CaMK2g	UniRef100_G1TEL6, UniRef100_UPI00048EDF8E, UniRef100_P28652, UniRef100_UPI000383D0C3, UniRef100_Q3MHJ9, UniRef100_Q923T9, UniRef100_E2RR74, UniRef100_P11730, UniRef100_G1TVE5, UniRef100_O77708, UniRef100_Q2HJF7, UniRef100_Q9UQM7, UniRef100_Q53H78, UniRef100_P15791, UniRef100_G1U0Y0, UniRef100_P11798, UniRef100_O77707, UniRef100_O77706, UniRef100_E2RG57, UniRef100_UPI00005A0756, UniRef100_P08413, …	DLKPENLLLASK	Lys2	5.20279
PKCi	UniRef100_L8IRS9, UniRef100_P41743, UniRef100_F1PG28, UniRef100_Q62074	IYAMKVVK	Lys1	5.15206
IKKb	UniRef100_UPI00048FC562, UniRef100_Q95KV0, UniRef100_E2RKR0, UniRef100_O88351, UniRef100_O14920, UniRef100_Q9QY78, UniRef100_UPI00048D11D1, UniRef100_G1SSF8	DLKPENIVLQQGEQR	Lys2	5.04335
MSK1 domain1	UniRef100_O75582, UniRef100_D3ZY17, UniRef100_UPI000383F235, UniRef100_Q8C050, UniRef100_G1SW53, UniRef100_F1PMJ3	DIKLENILLDSNGHVVLTDFGLSK	Lys2	4.94651
MAP3K4	UniRef100_E2R9L4, UniRef100_UPI00048A7200, UniRef100_Q9Y6R4, UniRef100_D3ZGU6, UniRef100_O08648, UniRef100_UPI0001CE23F0, UniRef100_UPI000383E5A1, UniRef100_G1TD48	DIKGANIFLTSSGLIK	Lys2	4.91917
PCTAIRE2, PCTAIRE3	UniRef100_F1MN42, UniRef100_F1PBY2, UniRef100_UPI0003ADFC67, UniRef100_Q00537, UniRef100_O35832, UniRef100_O35831, UniRef100_Q8K0D0, UniRef100_Q04899, UniRef100_G1T5Q1, UniRef100_A3KMY7, UniRef100_Q07002	SKLTENLVALKEIR	Lys1	4.82128
TLK1	UniRef100_D3ZXW7, UniRef100_Q8C0V0, UniRef100_UPI0003D0AFF0, UniRef100_UPI0001CE0A07, UniRef100_UPI00017C2ACD, UniRef100_Q9UKI8, UniRef100_F1PUB2, UniRef100_G1T3V4	YLNEIKPPIIHYDLKPGNILLVDGTACGEIK	Lys2	4.82079
MST3	UniRef100_F1PTW4, UniRef100_Q99KH8, UniRef100_UPI0000EBD50C, UniRef100_UPI0004902421, UniRef100_UPI0001CE27F1, UniRef100_B0LT89, UniRef100_G1U840, UniRef100_Q9Y6E0	DIKAANVLLSEHGEVK	Lys2	4.62709
p38b	UniRef100_UPI0003AE3931, UniRef100_UPI00048AD892, UniRef100_Q15759, UniRef100_UPI000383EC8A, UniRef100_Q9WUI1, UniRef100_D4A3U7	QELNKTVWEVPQR	Other	4.59302
STLK5	UniRef100_Q7RTN6, UniRef100_Q3UUJ4, UniRef100_UPI00048F1701, UniRef100_UPI0004914ACA, UniRef100_Q7TNZ6, UniRef100_A2VE62, UniRef100_G1SLH4, UniRef100_E2RGK3, UniRef100_UPI00048C233E, UniRef100_UPI0001CE1CE7	YSVKVLPWLSPEVLQQNLQGYDAK	Activation Loop	4.48515
LATS1	UniRef100_UPI0001C60F20, UniRef100_E1BCH5, UniRef100_O95835, UniRef100_J9P8D0, UniRef100_F1M2K4, UniRef100_Q8BYR2, UniRef100_G1TC45	DIKPDNILIDR	Lys2	4.22861
MAST3	UniRef100_UPI000383E5E4, UniRef100_Q3U214, UniRef100_O60307, UniRef100_UPI0000DA3E1E, UniRef100_E2RDG2	DLKPDNLLITSLGHIK	Lys2	4.02108
AurA	UniRef100_O14965, UniRef100_UPI00005A4587, UniRef100_Q2TA06, UniRef100_P97477, UniRef100_P59241	FILALKVLFK	Lys1	3.99631
p38a	UniRef100_UPI0001CE29D9, UniRef100_Q16539, UniRef100_Q95NE7, UniRef100_O02812, UniRef100_P70618, UniRef100_P47811, UniRef100_UPI0001C649AA, UniRef100_G1T850	QELNKTIWEVPER	Other	3.91904
MAP3K2	UniRef100_Q9Y2U5, UniRef100_Q61083, UniRef100_UPI0000EB1709, UniRef100_UPI00048AFAD2, UniRef100_UPI00048D9CD3, UniRef100_UPI0001CE1C08, UniRef100_F1M9D0, UniRef100_F1MSX4, UniRef100_UPI000491827F, UniRef100_G1TL20, UniRef100_G1SH57	ELAVKQVQFDPDSPETSKEVNALECEIQLLK	Lys1	3.76248
TBK1	UniRef100_Q9UHD2, UniRef100_E1BKP4, UniRef100_D4A7D3, UniRef100_E2R4G3, UniRef100_Q9WUN2	TGDLFAIKVFNNISFLRPVDVQMR	Lys1	3.72346
FYN, SRC, YES	UniRef100_Q99PW1, UniRef100_E1BIM8, UniRef100_G1SPV2, UniRef100_A7MB57, UniRef100_E2RSH8, UniRef100_UPI0001CE28FE, UniRef100_E2RC09, UniRef100_G1SXH7, UniRef100_P06241, UniRef100_Q28923, UniRef100_P05480, UniRef100_UPI00048F6589, UniRef100_Q9WUD9, UniRef100_P12931, UniRef100_P39688, UniRef100_A0JNB0, UniRef100_Q04736, UniRef100_Q62844, UniRef100_P07947	QGAKFPIKWTAPEAALYGR	Activation Loop	3.72246
PEK	UniRef100_E2QWG6, UniRef100_Q9NZJ5, UniRef100_Q9Z1Z1, UniRef100_Q9Z2B5, UniRef100_A5D791	DLKPSNIFFTMDDVVK	Lys2	3.68824
FER	UniRef100_P09760, UniRef100_UPI00017C329D, UniRef100_UPI0001CE264C, UniRef100_F1P8N3, UniRef100_P70451, UniRef100_G1T094, UniRef100_P16591, UniRef100_UPI000490BFE1	QEDGGVYSSSGLKQIPIK	Activation Loop	3.55301
SLK	UniRef100_UPI0001CE1A08, UniRef100_Q9H2G2, UniRef100_E2RFZ4, UniRef100_G1SIX1, UniRef100_G3X696, UniRef100_O08815, UniRef100_O54988	AQNKETSVLAAAKVIDTK	Lys1	3.41837
RSK4 domain1	UniRef100_UPI000383D34A, UniRef100_F1LYL8, UniRef100_UPI00005A5E3F, UniRef100_Q7TPS0, UniRef100_Q9UK32	DLKPENILLDEIGHIK	Lys2	3.37429
FER	UniRef100_P09760, UniRef100_UPI00017C329D, UniRef100_UPI0001CE264C, UniRef100_F1P8N3, UniRef100_P70451, UniRef100_G1T094, UniRef100_P16591, UniRef100_UPI000490BFE1	TSVAVKTCKEDLPQELK	Lys1	3.28178
MLK4	UniRef100_Q5TCX8, UniRef100_Q8VDG6, UniRef100_E2R7P5, UniRef100_D4A454, UniRef100_UPI0000EBE762	DLKSSNILLLEK	Lys2	3.21029
eEF2K	UniRef100_P70531, UniRef100_E2RIJ6, UniRef100_O08796, UniRef100_E1BEM1, UniRef100_O00418, UniRef100_G1SUE3	YIKYNSNSGFVR	ATP	3.1676
MAP3K6	UniRef100_Q9WTR2, UniRef100_O95382, UniRef100_UPI000383FF93, UniRef100_D3ZFL3, UniRef100_F1P6H0	DIKGDNVLINTFSGLLK	Lys2	3.06266
SRC	UniRef100_E1BIM8, UniRef100_P05480, UniRef100_E2RSH8, UniRef100_Q9WUD9, UniRef100_P12931	VAIKTLKPGTMSPEAFLQEAQVMKK	Lys1	3.00843
MAP2K5	UniRef100_Q9WVS7, UniRef100_G1SWD5, UniRef100_UPI00048BE7FA, UniRef100_J9P3W4, UniRef100_Q13163, UniRef100_UPI00048D638C, UniRef100_Q62862, UniRef100_UPI00048D5B9E, UniRef100_E1BI01, UniRef100_UPI00048BABD2, UniRef100_UPI0001CE2C3C	DVKPSNMLVNTR	Lys2	2.96408
CHED	UniRef100_UPI0000DA409E, UniRef100_UPI0000EBC786, UniRef100_Q14004, UniRef100_J9P287, UniRef100_G1TBY3, UniRef100_Q69ZA1	DIKCSNILLNNR	Lys2	2.82126
RSK1 domain2	UniRef100_P18653, UniRef100_UPI0001C6255C, UniRef100_UPI0004915401, UniRef100_UPI0001CE18C8, UniRef100_G1TIQ4, UniRef100_E2RQU4, UniRef100_G1SI78, UniRef100_Q15418, UniRef100_A4IFF4, UniRef100_G1U4N1, UniRef100_UPI00048FEA5A, UniRef100_UPI0001C618F1	DLKPSNILYVDESGNPECLR	Lys2	2.74197
NDR1, NDR2	UniRef100_G1TPU5, UniRef100_A2VDV2, UniRef100_G3V9Q4, UniRef100_UPI000050840D, UniRef100_E2RA10, UniRef100_G1TB21, UniRef100_Q9Y2H1, UniRef100_A4GW50, UniRef100_E2R001, UniRef100_UPI00048A5AE7, UniRef100_A7MB32, UniRef100_G1TKH6, UniRef100_Q7TSE6, UniRef100_Q15208, UniRef100_UPI00048BB72B, UniRef100_Q91VJ4	LSDFGLCTGLKK	Activation Loop	2.69703
LOK	UniRef100_O94804, UniRef100_F1PBJ2, UniRef100_O55098, UniRef100_UPI0001CE1193, UniRef100_G1SN76, UniRef100_UPI000490014E, UniRef100_E1BK52, UniRef100_G1U395, UniRef100_UPI0000DA3364	NKETGALAAAKVIETK	Lys1	2.67233
TAO1, TAO3	UniRef100_E2RM17, UniRef100_O88664, UniRef100_Q5F2E8, UniRef100_G1TWC2, UniRef100_Q53UA7, UniRef100_E1BHE1, UniRef100_G1TA41, UniRef100_Q9H2K8, UniRef100_Q7L7X3, UniRef100_E1BJ19, UniRef100_Q8BYC6, UniRef100_UPI00048E1C5F	DIKAGNILLTEPGQVK	Lys2	2.57204
TAO2	UniRef100_Q9JLS3, UniRef100_Q6ZQ29, UniRef100_E2QSP8, UniRef100_Q9UL54, UniRef100_UPI00038413AB, UniRef100_UPI00048D9C5F, UniRef100_G1TFT1, UniRef100_G1TZM1	DVKAGNILLSEPGLVK	Lys2	2.5211
KHS1	UniRef100_F1N2U3, UniRef100_UPI0000250282, UniRef100_UPI0001CE239D, UniRef100_Q8BPM2, UniRef100_E2RGP4, UniRef100_Q9Y4K4	DIKGANILLTDHGDVK	Lys2	2.49911
KHS1	UniRef100_F1N2U3, UniRef100_UPI0000250282, UniRef100_UPI0001CE239D, UniRef100_Q8BPM2, UniRef100_E2RGP4, UniRef100_Q9Y4K4	NVHTGELAAVKIIK	Lys1	2.49005
PLK1	UniRef100_P53350, UniRef100_G1SV90, UniRef100_E2RNE0, UniRef100_Q07832, UniRef100_Q2TA25, UniRef100_Q62673	CFEISDADTKEVFAGKIVPK	Lys1	2.47102
AKT1	UniRef100_Q01314, UniRef100_P47196, UniRef100_P31749, UniRef100_E2RJX4, UniRef100_P31750	GTFGKVILVK	ATP Loop	2.41092
LATS2	UniRef100_UPI00048E70CE, UniRef100_G1SX82, UniRef100_UPI00001819D6, UniRef100_Q9NRM7, UniRef100_E2QUS6, UniRef100_UPI0000EBD489, UniRef100_UPI0001CE23AB, UniRef100_Q7TSJ6	DIKPDNILIDLDGHIK	Lys2	2.36865
p38a	UniRef100_UPI0001CE29D9, UniRef100_Q16539, UniRef100_Q95NE7, UniRef100_O02812, UniRef100_P70618, UniRef100_P47811, UniRef100_UPI0001C649AA, UniRef100_G1T850	DLKPSNLAVNEDCELK	Lys2	2.33146
NEK9	UniRef100_UPI000154F746, UniRef100_E2QYP0, UniRef100_UPI0000EBD2CC, UniRef100_Q8TD19, UniRef100_Q8K1R7, UniRef100_UPI0001CE1500, UniRef100_G1SYU0	DIKTLNIFLTK	Lys2	2.30967
CSK	UniRef100_UPI00048B6CEB, UniRef100_Q0VBZ0, UniRef100_G1TJ26, UniRef100_P32577, UniRef100_E2RFF7, UniRef100_P41240, UniRef100_P41241	VSDFGLTKEASSTQDTGKLPVK	Activation Loop	2.3034
AMPKa1, AMPKa2	UniRef100_Q8BRK8, UniRef100_F1PIW7, UniRef100_G1SEA7, UniRef100_UPI0001CE2416, UniRef100_F1MBG5, UniRef100_F1PIY1, UniRef100_Q09137, UniRef100_Q5EG47, UniRef100_P54645, UniRef100_P54646, UniRef100_Q96E92, UniRef100_D2HX61, UniRef100_G1SMV0	VAVKILNR	Lys1	2.17596
MAP3K15, MAP3K5, MAP3K6	UniRef100_UPI00049005E8, UniRef100_D3ZZH6, UniRef100_Q99683, UniRef100_O35099, UniRef100_UPI000383FF93, UniRef100_G1T9G5, UniRef100_F1PA02, UniRef100_UPI0001CE304D, UniRef100_G1SHF8, UniRef100_A2AQW0, UniRef100_G1T825, UniRef100_Q9WTR2, UniRef100_UPI00048E5F59, UniRef100_UPI00017C2F16, UniRef100_O95382, UniRef100_UPI0002257F44, UniRef100_Q6ZN16, UniRef100_D3ZFL3, UniRef100_F1P6H0	IAIKEIPER	Lys1	2.16468
MAP2K4	UniRef100_P45985, UniRef100_F1PBB6, UniRef100_P47809, UniRef100_G1SYK3, UniRef100_A5PJP8	LCDFGISGQLVDSIAKTR	Activation Loop	2.10124
RSK1 domain1	UniRef100_P18653, UniRef100_UPI0001C6255C, UniRef100_UPI0004915401, UniRef100_UPI0001CE18C8, UniRef100_G1TIQ4, UniRef100_E2RQU4, UniRef100_G1SI78, UniRef100_Q15418, UniRef100_A4IFF4, UniRef100_G1U4N1, UniRef100_UPI00048FEA5A, UniRef100_UPI0001C618F1	LTDFGLSKEAIDHEKK	Activation Loop	2.0557
FAM20B	UniRef100_O75063, UniRef100_D3ZUZ4, UniRef100_Q8VCS3	ETEPACADGDIMEGSVTLWLPDVWPLQKHR	ATP	2.02198
MAPKAPK2, MAPKAPK3	UniRef100_Q3SYZ2, UniRef100_Q80ZF4, UniRef100_Q66H84, UniRef100_F1PU32, UniRef100_UPI00038400E2, UniRef100_Q16644, UniRef100_Q3UMW7, UniRef100_G1SNN9, UniRef100_F1PZ82, UniRef100_P49139, UniRef100_P49138, UniRef100_P49137	DVKPENLLYTSK	Lys2	2.00417
PCTAIRE1	UniRef100_UPI0002257F74, UniRef100_UPI0001CE13F5, UniRef100_UPI00048A660F, UniRef100_UPI0004907B9C, UniRef100_UPI0004920354, UniRef100_A6QR30, UniRef100_Q00536, UniRef100_UPI000490F7FD, UniRef100_G1SV23, UniRef100_Q04735, UniRef100_Q63686, UniRef100_UPI00048DDB78	SKLTDNLVALKEIR	Lys1	1.78525
OSR1	UniRef100_C9JIG9, UniRef100_UPI00048E5C29, UniRef100_F1MYV9, UniRef100_E2RAI8, UniRef100_O95747, UniRef100_D3ZUC9, UniRef100_Q6P9R2, UniRef100_UPI00048A78CE	DVKAGNILLGEDGSVQIADFGVSAFLATGGDITR	Lys2	1.75828
CSK	UniRef100_UPI00048B6CEB, UniRef100_Q0VBZ0, UniRef100_G1TJ26, UniRef100_P32577, UniRef100_E2RFF7, UniRef100_P41240, UniRef100_P41241	VAVKCIK	Lys1	1.74254
CDK2	UniRef100_Q5E9Y0, UniRef100_P24941, UniRef100_Q63699, UniRef100_Q3U6X7, UniRef100_E2QW70, UniRef100_P97377, UniRef100_G1U4R9	LTGEVVALKK	Lys1	1.64895
PKCi	UniRef100_L8IRS9, UniRef100_P41743, UniRef100_F1PG28, UniRef100_Q62074	DLKLDNVLLDSEGHIK	Lys2	1.3771
CCRK	UniRef100_Q9JHU3, UniRef100_A6H7E6, UniRef100_Q4KM34, UniRef100_F1PPV7, UniRef100_Q8IZL9	DLKPANLLISASGQLK	Lys2	1.25299
GCN2 domain2	UniRef100_UPI00049159CD, UniRef100_UPI00048BE1B1, UniRef100_D4A7V9, UniRef100_Q9QZ05, UniRef100_Q9P2K8, UniRef100_E2RS10, UniRef100_G1SR58, UniRef100_UPI000383ED47	LDGCCYAVKR	Lys1	1.24723
ATR	UniRef100_UPI0000DA30CB, UniRef100_UPI0001CE2B18, UniRef100_Q13535, UniRef100_UPI0000EBC351, UniRef100_G1SGC5, UniRef100_Q9JKK8, UniRef100_E2QXA4, UniRef100_UPI00048CC0C3	FYIMMCKPK	ATP	1.23613
SGK3	UniRef100_G1SRH1, UniRef100_Q96BR1, UniRef100_G1SRH4, UniRef100_Q8R4V0, UniRef100_UPI0001C63498, UniRef100_F1MSV4, UniRef100_G1T1J7, UniRef100_UPI00048B1786, UniRef100_UPI0001CE09BD, UniRef100_UPI0001CE09BC, UniRef100_Q9ERE3, UniRef100_Q9XT18, UniRef100_D7NGX9, UniRef100_UPI0004921E64	DLKPENILLDSVGHVVLTDFGLCK	Lys2	1.22239
CHK1	UniRef100_B4DT73, UniRef100_O35280, UniRef100_A5D7V1, UniRef100_Q91ZN7, UniRef100_F1PUR2	LSKGDGLEFK	Other	1.15441
EphA1	UniRef100_UPI0001CE09EB, UniRef100_UPI0000615CDC, UniRef100_Q60750, UniRef100_P21709, UniRef100_UPI00048C4D0D, UniRef100_G1T0K8, UniRef100_E2R6A6, UniRef100_D3ZDH4	LLDDFDGTYETQGGKIPIR	Activation Loop	1.02106
CDK5	UniRef100_Q00535, UniRef100_Q03114, UniRef100_P49615, UniRef100_E2RGN2	NRETHEIVALKR	Lys1	0.948247
Erk2	UniRef100_F1MI27, UniRef100_P63085, UniRef100_UPI0001CE1925, UniRef100_G1T5Y1, UniRef100_P28482	DLKPSNLLLNTTCDLK	Lys2	0.790091
MLKL	UniRef100_M0RDC7, UniRef100_Q8NB16, UniRef100_Q9D2Y4	VKSTAYLSPQELEDVFYQYDVK	Activation Loop	0.748764
MST2	UniRef100_Q13188, UniRef100_A0JN96, UniRef100_O54748, UniRef100_Q9JI10, UniRef100_F6URD2	ESGQVVAIKQVPVESDLQEIIK	Lys1	0.730861
IRAK4	UniRef100_Q1RMT8, UniRef100_Q8R4K2, UniRef100_Q9NWZ3, UniRef100_E2RDL0, UniRef100_D4A7K4, UniRef100_G1SL29	DIKSANILLDEAFTAK	Lys2	0.674331
TLK2	UniRef100_UPI00048D6721, UniRef100_Q86UE8, UniRef100_G1SQ97, UniRef100_F1P773, UniRef100_UPI00048F9073, UniRef100_J3QLK5, UniRef100_O55047, UniRef100_UPI00048AEC91, UniRef100_UPI000383DDF9, UniRef100_UPI00048AD26C, UniRef100_UPI00048DDE19, UniRef100_Q4R8C4	YVAVKIHQLNK	Lys1	0.598734
PIK3CA	UniRef100_P32871, UniRef100_P42336, UniRef100_P42337	RPLWLNWENPDIMSELLFQNNEIIFKNGDDLRQDMLTLQIIR	ATP	0.585438
MST1, MST2	UniRef100_Q5E9L6, UniRef100_D4A648, UniRef100_Q13188, UniRef100_A0JN96, UniRef100_F1PGB1, UniRef100_G1SIV1, UniRef100_O54748, UniRef100_Q13043, UniRef100_G1SM04, UniRef100_Q9JI10, UniRef100_Q9JI11, UniRef100_F6URD2, UniRef100_UPI0001CE0D7E	DIKAGNILLNTEGHAK	Lys2	0.516137
MSK2 domain1	UniRef100_O75676, UniRef100_F1MQE1, UniRef100_Q9Z2B9, UniRef100_D3ZSB7, UniRef100_F1PH63	DLKLENVLLDSEGHIVLTDFGLSK	Lys2	0.5064
CDK5	UniRef100_Q00535, UniRef100_Q03114, UniRef100_P49615, UniRef100_E2RGN2	DLKPQNLLINR	Lys2	0.486781
RSK2 domain2	UniRef100_Q9TSC3, UniRef100_P18654, UniRef100_F1MZW8, UniRef100_P51812, UniRef100_D3Z8E0, UniRef100_B1AXN9	DLKPSNILYVDESGNPESIR	Lys2	0.350586
CDK9	UniRef100_P50750, UniRef100_Q5EAB2, UniRef100_J9NWT0, UniRef100_Q99J95	IGQGTFGEVFKAR	ATP Loop	0.31742
PKR	UniRef100_G1SSL4, UniRef100_Q03963, UniRef100_P19525, UniRef100_Q63184, UniRef100_Q287T5	IGDFGLVTSLKNDGKR	Activation Loop	0.2798
GCK	UniRef100_UPI00048DEF0C, UniRef100_Q12851, UniRef100_UPI00017C40D0, UniRef100_UPI0000181DD5, UniRef100_P35557, UniRef100_UPI0003ADDD46, UniRef100_Q61161	DIKGANLLLTLQGDVK	Lys2	0.242036
AurA, AurB, AurC	UniRef100_O14965, UniRef100_O55099, UniRef100_E2QZL4, UniRef100_Q96GD4, UniRef100_D4AD76, UniRef100_UPI00005A4587, UniRef100_F1MY86, UniRef100_Q9UQB9, UniRef100_Q2TA06, UniRef100_P97477, UniRef100_O70126, UniRef100_O88445, UniRef100_Q08DN4, UniRef100_F1PM71, UniRef100_P59241	GKFGNVYLAR	ATP Loop	0.109606
IKKe, TBK1	UniRef100_UPI0001CE25FC, UniRef100_UPI00048B452C, UniRef100_U3KNT8, UniRef100_G1T2P2, UniRef100_D4A5E7, UniRef100_Q9UHD2, UniRef100_UPI00049016BB, UniRef100_Q29RL5, UniRef100_D4A7D3, UniRef100_G1T9F4, UniRef100_E2RAF7, UniRef100_E2R4G3, UniRef100_Q9WUN2, UniRef100_Q14164, UniRef100_E1BKP4, UniRef100_Q9R0T8	DIKPGNIMR	Lys2	0.057676
SRPK1, SRPK2	UniRef100_Q4KLN3, UniRef100_UPI0003AE5099, UniRef100_UPI0003D0C88A, UniRef100_UPI0003840299, UniRef100_O70551, UniRef100_P78362, UniRef100_Q96SB4, UniRef100_E1BNV4, UniRef100_E2RL63, UniRef100_O54781	FVAMKVVK	Lys1	0.0114854
JAK1 domain1	UniRef100_P52332, UniRef100_O35803, UniRef100_G1SQL4, UniRef100_UPI0002089A26, UniRef100_G3V9W2, UniRef100_UPI0001CE2331, UniRef100_P23458, UniRef100_UPI00005A0C3F	QLASALSYLEDKDLVHGNVCTKNLLLAR	Activation Loop	-0.213277
PKD3	UniRef100_E2R428, UniRef100_Q8K1Y2, UniRef100_D4A229, UniRef100_G1SSZ9, UniRef100_UPI0000EBD322, UniRef100_O94806	DVAIKVIDK	Lys1	-0.226117
MST3	UniRef100_F1PTW4, UniRef100_Q99KH8, UniRef100_UPI0000EBD50C, UniRef100_UPI0004902421, UniRef100_UPI0001CE27F1, UniRef100_B0LT89, UniRef100_G1U840, UniRef100_Q9Y6E0	VVAIKIIDLEEAEDEIEDIQQEITVLSQCDSPYVTK	Lys1	-0.238971
PKR	UniRef100_G1SSL4, UniRef100_Q03963, UniRef100_P19525, UniRef100_Q63184, UniRef100_Q287T5	TYVIKR	Lys1	-0.373284
SLK	UniRef100_UPI0001CE1A08, UniRef100_Q9H2G2, UniRef100_E2RFZ4, UniRef100_G1SIX1, UniRef100_G3X696, UniRef100_O08815, UniRef100_O54988	DLKAGNILFTLDGDIK	Lys2	-0.522839
PHKg2	UniRef100_P31325, UniRef100_Q2KJ16, UniRef100_Q9DB30, UniRef100_E2R3E4, UniRef100_P15735	ATGHEFAVKIMEVTAER	Lys1	-0.712321
CDK11, CDK8	UniRef100_U3KN30, UniRef100_UPI0003C49334, UniRef100_P49336, UniRef100_G1T7L1, UniRef100_G3N1G7, UniRef100_UPI0004910455, UniRef100_Q9BWU1, UniRef100_UPI00048DE928, UniRef100_UPI0001CE2836, UniRef100_Q8R3L8, UniRef100_D3ZDM6, UniRef100_F1PFP4, UniRef100_Q8BWD8, UniRef100_W5PJS1, UniRef100_UPI0000DA38BA	DLKPANILVMGEGPER	Lys2	-0.744887
EGFR	UniRef100_P00533, UniRef100_UPI0002256545, UniRef100_Q9QX70, UniRef100_F1N7F3, UniRef100_Q01279	ITDFGLAKLLGAEEK	Activation Loop	-0.819232
EphB2	UniRef100_P54763, UniRef100_P29323, UniRef100_B2B9B0, UniRef100_UPI0001D56BEF, UniRef100_F1PAF1	FLEDDTSDPTYTSALGGKIPIR	Activation Loop	-0.820491
ROCK1	UniRef100_UPI000490C92D, UniRef100_F1PU60, UniRef100_Q63644, UniRef100_O77819, UniRef100_P70335, UniRef100_G1TY77, UniRef100_F1MF50, UniRef100_Q13464, UniRef100_UPI0001CE1C69, UniRef100_G1SMN4	KLQLELNQER	Other	-1.00044
LOK	UniRef100_O94804, UniRef100_F1PBJ2, UniRef100_O55098, UniRef100_UPI0001CE1193, UniRef100_G1SN76, UniRef100_UPI000490014E, UniRef100_E1BK52, UniRef100_G1U395, UniRef100_UPI0000DA3364	DLKAGNVLMTLEGDIR	Lys2	-1.02227
PI4KA, PI4KAP2	UniRef100_F1LRW9, UniRef100_F1PMC5, UniRef100_A4QPH2, UniRef100_UPI0003AE3EBF, UniRef100_F1MLV0, UniRef100_Q6DIC7, UniRef100_O08662, UniRef100_P42356, UniRef100_G1SWD8	SGTPMQSAAKAPYLAK	ATP	-1.14477
GCK	UniRef100_UPI00048DEF0C, UniRef100_Q12851, UniRef100_UPI00017C40D0, UniRef100_UPI0000181DD5, UniRef100_P35557, UniRef100_UPI0003ADDD46, UniRef100_Q61161	DTVTSELAAVKIVK	Lys1	-1.46631
SNRK	UniRef100_G1TXD8, UniRef100_Q9NRH2, UniRef100_Q8VDU5, UniRef100_Q63553, UniRef100_E1BHE7, UniRef100_UPI0001CE21A9, UniRef100_UPI00048D3014, UniRef100_J9NSM5, UniRef100_G1SUU1	DLKPENVVFFEK	Lys2	-1.48672
RSKL1	UniRef100_D3Z991, UniRef100_E1BB43, UniRef100_Q8BLK9, UniRef100_E2RR13, UniRef100_UPI0001CE2460, UniRef100_UPI0000DA3A28, UniRef100_Q96S38, UniRef100_UPI0001CE245F, UniRef100_G1T6G2	VLGVIDKVLLVMDTR	ATP	-1.592
STLK6	UniRef100_F1MB87, UniRef100_Q8K4T3, UniRef100_F1PQ92, UniRef100_D3ZVH0, UniRef100_Q9C0K7	SIKASHILISGDGLVTLSGLSHLHSLVK	Lys2	-1.79051
YANK3	UniRef100_Q8QZV4, UniRef100_D4A3D9, UniRef100_F1PZW6, UniRef100_Q86UX6, UniRef100_UPI000383B1A7	DVKPDNILLDER	Lys2	-2.10194
EGFR	UniRef100_P00533, UniRef100_UPI0002256545, UniRef100_Q9QX70, UniRef100_F1N7F3, UniRef100_Q01279	IPVAIKELR	Lys1	-2.14087
NDR2	UniRef100_E2R001, UniRef100_A7MB32, UniRef100_Q9Y2H1, UniRef100_Q7TSE6	DIKPDNLLLDAK	Lys2	-2.23193
ULK1	UniRef100_O70405, UniRef100_UPI0000DC17FB, UniRef100_O75385, UniRef100_J9P131, UniRef100_F1MFB2	DLKPQNILLSNPAGR	Lys2	-2.3
TLK2	UniRef100_UPI00048D6721, UniRef100_Q86UE8, UniRef100_G1SQ97, UniRef100_F1P773, UniRef100_UPI00048F9073, UniRef100_J3QLK5, UniRef100_O55047, UniRef100_UPI00048AEC91, UniRef100_UPI000383DDF9, UniRef100_UPI00048AD26C, UniRef100_UPI00048DDE19, UniRef100_Q4R8C4	YLNEIKPPIIHYDLKPGNILLVNGTACGEIK	Lys2	-2.31587
ULK3	UniRef100_F1P6D2, UniRef100_D3DW67, UniRef100_G1TT36, UniRef100_UPI000490531F, UniRef100_D3ZHP7, UniRef100_F1N332, UniRef100_Q3U3Q1	NISHLDLKPQNILLSSLEKPHLK	Lys2	-2.39521
PAN3	UniRef100_G1U195, UniRef100_Q640Q5, UniRef100_Q58A45, UniRef100_D4ADM2	IQKSSNFGYITSCYK	ATP	-2.5132
PKR	UniRef100_G1SSL4, UniRef100_Q03963, UniRef100_P19525, UniRef100_Q63184, UniRef100_Q287T5	DLKPSNIFLVDTK	Lys2	-2.60284
RON	UniRef100_UPI000017ED6E, UniRef100_UPI0000EBE07B, UniRef100_Q6DTW4, UniRef100_Q04912, UniRef100_Q62190	IQCAIKSLSR	Lys1	-2.63814
p38d, p38g	UniRef100_O15264, UniRef100_A5PJL3, UniRef100_O08911, UniRef100_E2RKA7, UniRef100_G1STA2, UniRef100_Q5E9Q6, UniRef100_P53778, UniRef100_Q63538, UniRef100_Q9WTY9, UniRef100_J9NSF6, UniRef100_UPI0001C60CCC, UniRef100_G1TYT9, UniRef100_Q9Z1B7	DLKPGNLAVNEDCELK	Lys2	-2.73261
JAK1 domain2	UniRef100_P52332, UniRef100_O35803, UniRef100_G1SQL4, UniRef100_UPI0002089A26, UniRef100_G3V9W2, UniRef100_UPI0001CE2331, UniRef100_P23458, UniRef100_UPI00005A0C3F	IGDFGLTKAIETDKEYYTVK	Activation Loop	-2.84892
ULK3	UniRef100_F1P6D2, UniRef100_D3DW67, UniRef100_G1TT36, UniRef100_UPI000490531F, UniRef100_D3ZHP7, UniRef100_F1N332, UniRef100_Q3U3Q1	EVVAIKCVAK	Lys1	-2.85675
PIP4K2A	UniRef100_O70172, UniRef100_F1MHR4, UniRef100_P48426, UniRef100_UPI00048FC137, UniRef100_G1TD16, UniRef100_G1TAI4, UniRef100_Q9R0I8	AKELPTLKDNDFINEGQK	ATP	-3.03689
ABL, ARG	UniRef100_Q4JIM5, UniRef100_F1PEX7, UniRef100_G1U0I1, UniRef100_UPI00005BE701, UniRef100_G1SVS3, UniRef100_UPI00005825F8, UniRef100_F1M0A6, UniRef100_UPI00005A1353, UniRef100_P42684, UniRef100_P00519, UniRef100_UPI0001CE24E0, UniRef100_UPI000491F5FB, UniRef100_P00520, UniRef100_UPI0001CE24DF, UniRef100_G1SSF7, UniRef100_Q2PYT3, UniRef100_UPI0001CE24DE, UniRef100_UPI00048D9B48, UniRef100_UPI00048C…	LMTGDTYTAHAGAKFPIK	Activation Loop	-3.23732
MAP2K1, MAP2K2	UniRef100_P31938, UniRef100_J9P5W6, UniRef100_Q1HG70, UniRef100_Q01986, UniRef100_P36507, UniRef100_P36506, UniRef100_Q17QH2, UniRef100_P29678, UniRef100_G1SVV6, UniRef100_Q63932, UniRef100_Q7M3J2, UniRef100_Q02750	DVKPSNILVNSR	Lys2	-3.42839
BRAF	UniRef100_Q698R1, UniRef100_P28028, UniRef100_UPI0004911486, UniRef100_P15056, UniRef100_UPI0000DA2545, UniRef100_UPI0004901DE8, UniRef100_F1MDL4, UniRef100_UPI0004900946, UniRef100_G1SP13, UniRef100_UPI0001CE21A2	DLKSNNIFLHEDLTVK	Lys2	-3.44456
FRAP	UniRef100_P42345, UniRef100_P42346, UniRef100_E2R2L2, UniRef100_UPI000383DF1B, UniRef100_G1T4N5, UniRef100_Q9JLN9, UniRef100_P20646	IQSIAPSLQVITSKQRPR	ATP	-3.49146
CHK2	UniRef100_Q58DJ9, UniRef100_G1TF11, UniRef100_O96017, UniRef100_UPI0001CE1742, UniRef100_Q9R019, UniRef100_UPI00048F6AD0, UniRef100_E2QU88, UniRef100_Q9Z265	VAIKIISK	Lys1	-3.50696
PLK1	UniRef100_P53350, UniRef100_G1SV90, UniRef100_E2RNE0, UniRef100_Q07832, UniRef100_Q2TA25, UniRef100_Q62673	DLKLGNLFLNEDLEVK	Lys2	-3.61441
MET	UniRef100_P08581, UniRef100_P16056, UniRef100_Q99MC5, UniRef100_Q75ZY9, UniRef100_Q769I5, UniRef100_P97523	IHCAVKSLNR	Lys1	-3.79084
Wnk4	UniRef100_Q96J92, UniRef100_E1BM51, UniRef100_E2RNS7, UniRef100_Q80UE6	DLKCDNVFITGPTGSVK	Lys2	-3.8226
MST3, MST4, YSK1	UniRef100_O00506, UniRef100_F1PTW4, UniRef100_UPI00048CC759, UniRef100_F1PTW5, UniRef100_Q9Z2W1, UniRef100_Q99KH8, UniRef100_Q9P289, UniRef100_G1SSW2, UniRef100_E2QYE1, UniRef100_UPI0001CE161C, UniRef100_Q99JT2, UniRef100_F1N5W5, UniRef100_F1LXV3, UniRef100_G1U840, UniRef100_Q9Y6E0, UniRef100_UPI0000EBD50C, UniRef100_Q3SWY6, UniRef100_UPI0004902421, UniRef100_UPI0001CE27F1, UniRef100_B0LT89	LADFGVAGQLTDTQIKR	Activation Loop	-3.91847
PAN3	UniRef100_G1U195, UniRef100_Q640Q5, UniRef100_Q58A45, UniRef100_D4ADM2	VMDPTKILITGK	ATP	-4.01729
MAP2K6	UniRef100_Q925D6, UniRef100_E2R7W7, UniRef100_P70236, UniRef100_UPI0001CE1F0F, UniRef100_P52564, UniRef100_L5KNH7, UniRef100_Q5E9X2, UniRef100_G1STE8	MCDFGISGYLVDSVAKTIDAGCKPYMAPER	Activation Loop	-4.04605
MAP2K6	UniRef100_Q925D6, UniRef100_E2R7W7, UniRef100_P70236, UniRef100_UPI0001CE1F0F, UniRef100_P52564, UniRef100_L5KNH7, UniRef100_Q5E9X2, UniRef100_G1STE8	HVPSGQIMAVKR	Lys1	-4.20234
AMPKa1, AMPKa2	UniRef100_Q8BRK8, UniRef100_F1PIW7, UniRef100_G1SEA7, UniRef100_UPI0001CE2416, UniRef100_F1MBG5, UniRef100_F1PIY1, UniRef100_Q09137, UniRef100_Q5EG47, UniRef100_P54645, UniRef100_P54646, UniRef100_Q96E92, UniRef100_D2HX61, UniRef100_G1SMV0	DLKPENVLLDAHMNAK	Lys2	-4.21877
SMG1	UniRef100_G1TC15, UniRef100_UPI0000EBE37A, UniRef100_Q8BKX6, UniRef100_UPI00048B732E, UniRef100_J9NTC0, UniRef100_Q96Q15, UniRef100_UPI0000DA1D66	SYPYLFKGLEDLHLDER	ATP	-4.22516
RSK2 domain1	UniRef100_Q9TSC3, UniRef100_P18654, UniRef100_F1MZW8, UniRef100_P51812, UniRef100_D3Z8E0, UniRef100_B1AXN9	QLYAMKVLK	Lys1	-4.39666
LATS1	UniRef100_UPI0001C60F20, UniRef100_E1BCH5, UniRef100_O95835, UniRef100_J9P8D0, UniRef100_F1M2K4, UniRef100_Q8BYR2, UniRef100_G1TC45	ALYATKTLR	Lys1	-4.4501
MAP3K1	UniRef100_Q13233, UniRef100_B7NZB6, UniRef100_UPI0001CE2CA1, UniRef100_F1PT92, UniRef100_P53349, UniRef100_G1SWN6, UniRef100_UPI0004900D7F, UniRef100_Q62925, UniRef100_UPI00017C39E2	DVKGANLLIDSTGQR	Lys2	-4.48985
PCTAIRE2	UniRef100_F1MN42, UniRef100_UPI0003ADFC67, UniRef100_Q00537, UniRef100_O35831, UniRef100_Q8K0D0, UniRef100_G1T5Q1	DLKPQNLLINEK	Lys2	-4.49119
MAP2K1	UniRef100_P31938, UniRef100_J9P5W6, UniRef100_Q01986, UniRef100_P29678, UniRef100_G1SVV6, UniRef100_Q7M3J2, UniRef100_Q02750	IMHRDVKPSNILVNSR	Lys2	-4.63494
MST1	UniRef100_Q5E9L6, UniRef100_D4A648, UniRef100_F1PGB1, UniRef100_G1SIV1, UniRef100_Q13043, UniRef100_G1SM04, UniRef100_Q9JI11, UniRef100_UPI0001CE0D7E	ETGQIVAIKQVPVESDLQEIIK	Lys1	-4.66089
PCTAIRE1, PCTAIRE3	UniRef100_UPI0002257F74, UniRef100_UPI0001CE13F5, UniRef100_F1PBY2, UniRef100_UPI0004920354, UniRef100_UPI000490F7FD, UniRef100_Q00536, UniRef100_Q04899, UniRef100_UPI0004907B9C, UniRef100_UPI00048A660F, UniRef100_A6QR30, UniRef100_G1SV23, UniRef100_Q04735, UniRef100_O35832, UniRef100_Q63686, UniRef100_UPI00048DDB78, UniRef100_A3KMY7, UniRef100_Q07002	DLKPQNLLINER	Lys2	-4.69849
NEK9	UniRef100_UPI000154F746, UniRef100_E2QYP0, UniRef100_UPI0000EBD2CC, UniRef100_Q8TD19, UniRef100_Q8K1R7, UniRef100_UPI0001CE1500, UniRef100_G1SYU0	LGDYGLAKK	Activation Loop	-4.80688
MAP2K4	UniRef100_P45985, UniRef100_F1PBB6, UniRef100_P47809, UniRef100_G1SYK3, UniRef100_A5PJP8	MVHKPSGQIMAVKR	Lys1	-4.91659
PI4KB	UniRef100_O08561, UniRef100_Q8BKC8, UniRef100_F1PPB7, UniRef100_F1MXI2, UniRef100_U3KP92, UniRef100_UPI00048BFF8D, UniRef100_B7NZD4, UniRef100_Q9UBF8, UniRef100_UPI0004907BB6, UniRef100_G1SHW1	VPHTQAVVLNSKDK	ATP	-4.92044
SMG1	UniRef100_G1TC15, UniRef100_UPI0000EBE37A, UniRef100_Q8BKX6, UniRef100_UPI00048B732E, UniRef100_J9NTC0, UniRef100_Q96Q15, UniRef100_UPI0000DA1D66	DTVTIHSVGGTITILPTKTKPK	ATP	-4.9527
NEK3	UniRef100_D3ZCU1, UniRef100_Q9R0A5, UniRef100_UPI00005A464C, UniRef100_A4IFF6, UniRef100_UPI000154F108, UniRef100_P51956	SKNIFLTQNGK	Activation Loop	-5.06144
MET	UniRef100_P08581, UniRef100_P16056, UniRef100_Q99MC5, UniRef100_Q75ZY9, UniRef100_Q769I5, UniRef100_P97523	TGAKLPVK	Activation Loop	-5.23577
MAP3K2, MAP3K3	UniRef100_Q61083, UniRef100_UPI0001CE1C08, UniRef100_UPI00048AFAD2, UniRef100_G1TL20, UniRef100_G1SH57, UniRef100_Q99759, UniRef100_Q9Y2U5, UniRef100_UPI00048D9CD3, UniRef100_UPI0000EB1709, UniRef100_F1MSX4, UniRef100_F1M9D0, UniRef100_B5DF98, UniRef100_UPI000491827F, UniRef100_Q61084, UniRef100_F1P750, UniRef100_UPI00023AD94E	DIKGANILR	Lys2	-5.25883
MAP2K4	UniRef100_P45985, UniRef100_F1PBB6, UniRef100_P47809, UniRef100_G1SYK3, UniRef100_A5PJP8	DIKPSNILLDR	Lys2	-5.43738
RSK1 domain1, RSK2 domain1, RSK3 domain1	UniRef100_P18653, UniRef100_Q9TSC3, UniRef100_UPI0004915401, UniRef100_UPI0001CE18C8, UniRef100_P18654, UniRef100_G1TIQ4, UniRef100_E2RQU4, UniRef100_G1SI78, UniRef100_F1MZW8, UniRef100_F1M7N7, UniRef100_Q15418, UniRef100_D3Z8E0, UniRef100_Q9WUT3, UniRef100_UPI00048FEA5A, UniRef100_G1U4N1, UniRef100_B1AXN9, UniRef100_F6UWI0, UniRef100_Q63531, UniRef100_UPI0001C6255C, UniRef100_F1MNR5, UniRef100_P…	DLKPENILLDEEGHIK	Lys2	-5.6591
IRAK4	UniRef100_Q1RMT8, UniRef100_Q8R4K2, UniRef100_Q9NWZ3, UniRef100_E2RDL0, UniRef100_D4A7K4, UniRef100_G1SL29	GYVNNTTVAVKK	Lys1	-5.75524
AurB	UniRef100_O55099, UniRef100_O70126, UniRef100_Q08DN4, UniRef100_E2QZL4, UniRef100_Q96GD4	SHFIVALKVLFK	Lys1	-5.90045
MET	UniRef100_P08581, UniRef100_P16056, UniRef100_Q99MC5, UniRef100_Q75ZY9, UniRef100_Q769I5, UniRef100_P97523	DMYDKEYYSVHNK	Activation Loop	-5.97753
PKN1	UniRef100_Q16512, UniRef100_Q63433, UniRef100_A1A4I4, UniRef100_P70268, UniRef100_UPI0000EB19A7	VLLSEFRPSGELFAIKALK	Lys1	-6.10832
CDC2	UniRef100_Q5H9N4, UniRef100_P48734, UniRef100_G1SIH0, UniRef100_P39951, UniRef100_E2RGJ9, UniRef100_P11440	DLKPQNLLIDDK	Lys2	-6.13068
MSK2 domain1	UniRef100_O75676, UniRef100_F1MQE1, UniRef100_Q9Z2B9, UniRef100_D3ZSB7, UniRef100_F1PH63	LYAMKVLR	Lys1	-6.17568
MST4, YSK1	UniRef100_O00506, UniRef100_UPI00048CC759, UniRef100_F1PTW5, UniRef100_Q9Z2W1, UniRef100_Q9P289, UniRef100_G1SSW2, UniRef100_Q3SWY6, UniRef100_E2QYE1, UniRef100_UPI0001CE161C, UniRef100_Q99JT2, UniRef100_F1N5W5, UniRef100_F1LXV3	DIKAANVLLSEQGDVK	Lys2	-6.3166
EphA2	UniRef100_F1Q4C5, UniRef100_E1BJ31, UniRef100_Q03145, UniRef100_P29317, UniRef100_UPI0000DA2A0B	EVPVAIKTLK	Lys1	-6.34726
CDK10	UniRef100_Q15131, UniRef100_Q2TBL8, UniRef100_Q3UMM4, UniRef100_E2R4K3, UniRef100_Q4KM47	DLKVSNLLMTDK	Lys2	-6.38821
LATS2	UniRef100_UPI00048E70CE, UniRef100_G1SX82, UniRef100_UPI00001819D6, UniRef100_Q9NRM7, UniRef100_E2QUS6, UniRef100_UPI0000EBD489, UniRef100_UPI0001CE23AB, UniRef100_Q7TSJ6	VDTHALYAMKTLR	Lys1	-6.40355
MST4	UniRef100_UPI00048CC759, UniRef100_Q9P289, UniRef100_G1SSW2, UniRef100_E2QYE1, UniRef100_UPI0001CE161C, UniRef100_Q99JT2, UniRef100_F1N5W5, UniRef100_F1LXV3	TQQVVAIKIIDLEEAEDEIEDIQQEITVLSQCDSSYVTK	Lys1	-6.48886
MAP2K3	UniRef100_F1PXD3, UniRef100_P46734, UniRef100_UPI00048F76BB, UniRef100_O09110, UniRef100_B1H230, UniRef100_G1THP8, UniRef100_A4IFH7	MCDFGISGYLVDSVAKTMDAGCKPYMAPER	Activation Loop	-6.52967
NEK1	UniRef100_E2R0E9, UniRef100_Q96PY6, UniRef100_D3ZB99, UniRef100_G1TCB8, UniRef100_UPI00048B9C6C, UniRef100_P51954, UniRef100_UPI000491B3C4, UniRef100_UPI000491CFCB, UniRef100_UPI0001CE07E3, UniRef100_UPI00048CF397, UniRef100_UPI000383F014, UniRef100_UPI000490B155	DIKSQNIFLTK	Lys2	-6.59592
RSK2 domain1	UniRef100_Q9TSC3, UniRef100_P18654, UniRef100_F1MZW8, UniRef100_P51812, UniRef100_D3Z8E0, UniRef100_B1AXN9	LTDFGLSKESIDHEKK	Activation Loop	-6.77223
PIK3C3	UniRef100_UPI0001CE24A2, UniRef100_O88763, UniRef100_Q6PF93, UniRef100_Q6JDI4, UniRef100_G1SX90, UniRef100_Q8NEB9, UniRef100_UPI000383BFFF	TEDGGKYPVIFKHGDDLR	ATP	-6.80953
DNAPK	UniRef100_Q8WN22, UniRef100_P97313, UniRef100_UPI0001D57DB6, UniRef100_P78527, UniRef100_G1SFY9, UniRef100_UPI0000DA49FD, UniRef100_UPI0001CE313F, UniRef100_U3KP21	EHPFLVKGGEDLR	ATP	-6.99103
HER2/ErbB2	UniRef100_P04626, UniRef100_P06494, UniRef100_P70424, UniRef100_O18735, UniRef100_UPI00023AD1E5	LLDIDETEYHADGGKVPIK	Activation Loop	-7.13127
KHS2	UniRef100_U3KPA8, UniRef100_Q8IVH8, UniRef100_E1BJH5, UniRef100_UPI00004BC889, UniRef100_UPI0004912646, UniRef100_Q99JP0, UniRef100_Q924I2, UniRef100_UPI0001CE0E19	DIKGANILLTDNGHVK	Lys2	-7.15133
YSK1	UniRef100_O00506, UniRef100_F1PTW5, UniRef100_Q9Z2W1, UniRef100_Q3SWY6	EVVAIKIIDLEEAEDEIEDIQQEITVLSQCDSPYITR	Lys1	-7.17571
FAK	UniRef100_O35346, UniRef100_P34152, UniRef100_UPI00048B5B9F, UniRef100_E2RGP8, UniRef100_UPI0001CE19C8, UniRef100_UPI0001C4E0EC, UniRef100_G1TS73, UniRef100_Q05397	YMEDSTYYKASK	Activation Loop	-7.36721
CK1a	UniRef100_Q32LI4, UniRef100_UPI00049102CA, UniRef100_P67827, UniRef100_UPI00049005F5, UniRef100_UPI0001CE300A, UniRef100_UPI0000171134, UniRef100_F1PUU1, UniRef100_P48729, UniRef100_UPI00048B6F79, UniRef100_UPI00048DB5E2, UniRef100_UPI00048E19E7, UniRef100_P97633, UniRef100_UPI00048BC370	DIKPDNFLMGIGR	Lys2	-7.40027
p70S6Kb	UniRef100_E1BLQ5, UniRef100_Q9Z1M4, UniRef100_Q9UBS0, UniRef100_D4AE24, UniRef100_E2R7K9	DLKPENIMLSSQGHIK	Lys2	-7.4929
SGK3	UniRef100_G1SRH1, UniRef100_Q96BR1, UniRef100_G1SRH4, UniRef100_Q8R4V0, UniRef100_UPI0001C63498, UniRef100_F1MSV4, UniRef100_G1T1J7, UniRef100_UPI00048B1786, UniRef100_UPI0001CE09BD, UniRef100_UPI0001CE09BC, UniRef100_Q9ERE3, UniRef100_Q9XT18, UniRef100_D7NGX9, UniRef100_UPI0004921E64	FYAVKVLQK	Lys1	-7.798
MLKL	UniRef100_M0RDC7, UniRef100_Q8NB16, UniRef100_Q9D2Y4	APVAIKVFK	Lys1	-7.86471
p70S6K	UniRef100_E2RMD8, UniRef100_P67998, UniRef100_G1SM45, UniRef100_Q6TJY3, UniRef100_P23443, UniRef100_P67999, UniRef100_Q8BSK8	DLKPENIMLNHQGHVK	Lys2	-8.02092
PKD2	UniRef100_E2RR18, UniRef100_Q9BZL6, UniRef100_Q8BZ03, UniRef100_F1MIA2, UniRef100_Q5XIS9	DVAVKVIDK	Lys1	-8.0667
PRPK	UniRef100_Q96S44, UniRef100_Q99PW4, UniRef100_D3ZL21, UniRef100_J9NUH9, UniRef100_A5PK80, UniRef100_UPI00048B65EF	FLSGLELVKQGAEAR	ATP Loop	-8.16174
MAPKAPK3	UniRef100_Q3SYZ2, UniRef100_Q66H84, UniRef100_F1PU32, UniRef100_Q16644, UniRef100_Q3UMW7, UniRef100_G1SNN9	CALKLLYDSPK	Lys1	-8.30876
CHK1	UniRef100_B4DT73, UniRef100_O35280, UniRef100_A5D7V1, UniRef100_Q91ZN7, UniRef100_F1PUR2	DIKPENLLLDER	Lys2	-8.31044
MAP2K3	UniRef100_F1PXD3, UniRef100_P46734, UniRef100_UPI00048F76BB, UniRef100_O09110, UniRef100_B1H230, UniRef100_G1THP8, UniRef100_A4IFH7	DVKPSNVLINK	Lys2	-8.40478
RSK1 domain1	UniRef100_P18653, UniRef100_UPI0001C6255C, UniRef100_UPI0004915401, UniRef100_UPI0001CE18C8, UniRef100_G1TIQ4, UniRef100_E2RQU4, UniRef100_G1SI78, UniRef100_Q15418, UniRef100_A4IFF4, UniRef100_G1U4N1, UniRef100_UPI00048FEA5A, UniRef100_UPI0001C618F1	KVTRPDSGHLYAMKVLK	Lys1	-8.58079
NDR1	UniRef100_G1TPU5, UniRef100_A2VDV2, UniRef100_UPI00048A5AE7, UniRef100_UPI000050840D, UniRef100_G3V9Q4, UniRef100_E2RA10, UniRef100_G1TKH6, UniRef100_G1TB21, UniRef100_Q15208, UniRef100_UPI00048BB72B, UniRef100_Q91VJ4, UniRef100_A4GW50	DIKPDNLLLDSK	Lys2	-8.686
PIK3C3	UniRef100_UPI0001CE24A2, UniRef100_O88763, UniRef100_Q6PF93, UniRef100_Q6JDI4, UniRef100_G1SX90, UniRef100_Q8NEB9, UniRef100_UPI000383BFFF	TEDGGKYPVIFKHGDDLRQDQLILQIISLMDK	ATP	-8.80841
KHS2	UniRef100_U3KPA8, UniRef100_Q8IVH8, UniRef100_E1BJH5, UniRef100_UPI00004BC889, UniRef100_UPI0004912646, UniRef100_Q99JP0, UniRef100_Q924I2, UniRef100_UPI0001CE0E19	NVNTGELAAIKVIK	Lys1	-8.81864
ROCK1, ROCK2	UniRef100_F1PU60, UniRef100_O77819, UniRef100_Q62868, UniRef100_F1PE53, UniRef100_F1N319, UniRef100_P70336, UniRef100_P70335, UniRef100_Q13464, UniRef100_UPI000490C92D, UniRef100_Q63644, UniRef100_O75116, UniRef100_G1TY77, UniRef100_F1MF50, UniRef100_UPI0001CE1C69, UniRef100_G1SMN4	DVKPDNMLLDK	Lys2	-9.11251
NEK8	UniRef100_D3ZGQ5, UniRef100_UPI00048D7091, UniRef100_UPI0002257FC4, UniRef100_Q91ZR4, UniRef100_UPI000490EE8D, UniRef100_Q86SG6, UniRef100_UPI0000EBDD57, UniRef100_G1SE82	DLKTQNILLDK	Lys2	-9.13467
EphA2	UniRef100_F1Q4C5, UniRef100_E1BJ31, UniRef100_Q03145, UniRef100_P29317, UniRef100_UPI0000DA2A0B	VLEDDPEATYTTSGGKIPIR	Activation Loop	-9.17163
NuaK1	UniRef100_Q641K5, UniRef100_O60285, UniRef100_E2RH25, UniRef100_D3ZQN8, UniRef100_E1B9B6	VVAIKSIR	Lys1	-9.29127
EphA3, EphA4, EphA5	UniRef100_D3ZZK3, UniRef100_P29320, UniRef100_E1BJS9, UniRef100_Q60629, UniRef100_F1M7W0, UniRef100_Q03137, UniRef100_F1PYW2, UniRef100_UPI000383EA65, UniRef100_P54764, UniRef100_O08680, UniRef100_F1PXW8, UniRef100_P29319, UniRef100_F1P925, UniRef100_P54757, UniRef100_E1BER5, UniRef100_P54756	GGKIPIR	Activation Loop	-9.46642
PIK3CB	UniRef100_Q8BTI9, UniRef100_Q9Z1L0, UniRef100_F1MYM3, UniRef100_G1SMR9, UniRef100_F6Y841, UniRef100_P42338	VFGEDSVGVIFKNGDDLRQDMLTLQMLR	ATP	-9.67951
DGKH	UniRef100_F1MI58, UniRef100_Q86XP1, UniRef100_A0JP53, UniRef100_D3ZSZ6, UniRef100_F1PFD9	ATFSFCVSPLLVFVNSKSGDNQGVK	ATP	-10.044
PRP4	UniRef100_G1SD98, UniRef100_G1U727, UniRef100_Q61136, UniRef100_E2RAT5, UniRef100_Q13523, UniRef100_Q08DZ2, UniRef100_Q5RKH1	CNILHADIKPDNILVNESK	Lys2	-10.2879
DNAPK	UniRef100_Q8WN22, UniRef100_P97313, UniRef100_UPI0001D57DB6, UniRef100_P78527, UniRef100_G1SFY9, UniRef100_UPI0000DA49FD, UniRef100_UPI0001CE313F, UniRef100_U3KP21	KGGSWIQEINVAEK	ATP	-10.3416
RAF1	UniRef100_Q99N57, UniRef100_E2REI6, UniRef100_P04049, UniRef100_P11345	DMKSNNIFLHEGLTVK	Lys2	-10.3868
NDR1	UniRef100_G1TPU5, UniRef100_A2VDV2, UniRef100_UPI00048A5AE7, UniRef100_UPI000050840D, UniRef100_G3V9Q4, UniRef100_E2RA10, UniRef100_G1TKH6, UniRef100_G1TB21, UniRef100_Q15208, UniRef100_UPI00048BB72B, UniRef100_Q91VJ4, UniRef100_A4GW50	DTGHVYAMKILR	Lys1	-10.4398
EGFR	UniRef100_P00533, UniRef100_UPI0002256545, UniRef100_Q9QX70, UniRef100_F1N7F3, UniRef100_Q01279	LLGAEEKEYHAEGGKVPIK	Activation Loop	-10.4883
CDK4	UniRef100_P11802, UniRef100_E2QUY0, UniRef100_P30285, UniRef100_P35426, UniRef100_Q32KY4	DLKPENILVTSGGTVK	Lys2	-11.0411
MAST4	UniRef100_F1Q4I0, UniRef100_UPI000491068B, UniRef100_UPI00048D6F95, UniRef100_UPI00048C51E8, UniRef100_UPI00048FEE6A, UniRef100_UPI00048B6FE4, UniRef100_O15021, UniRef100_UPI0001CE2D94, UniRef100_UPI00049082F6, UniRef100_UPI00048C5B44, UniRef100_M0R3L1, UniRef100_Q811L6, UniRef100_G1TA17, UniRef100_UPI00048E19B7, UniRef100_UPI00048D455C	DLKPDNLLVTSMGHIK	Lys2	-11.2669
NEK4	UniRef100_Q9Z1J2, UniRef100_F6V6J5, UniRef100_Q5M813, UniRef100_A6QQ15, UniRef100_UPI0001CE27FB, UniRef100_G1SY20, UniRef100_UPI0004908A28, UniRef100_UPI00048DEA71, UniRef100_UPI00048C611F, UniRef100_UPI00048AFF2F, UniRef100_UPI00048F34D8, UniRef100_UPI00048CFFA7, UniRef100_P51957, UniRef100_UPI00048EB138	DLKTQNVFLTR	Lys2	-11.3163
NDR2	UniRef100_E2R001, UniRef100_A7MB32, UniRef100_Q9Y2H1, UniRef100_Q7TSE6	DTGHIYAMKILR	Lys1	-11.5045
LYN	UniRef100_P25911, UniRef100_F1N261, UniRef100_G1SIY6, UniRef100_UPI0001CE0804, UniRef100_E2RBB8, UniRef100_Q07014, UniRef100_P07948	VAVKTLKPGTMSVQAFLEEANLMK	Lys1	-12.0458
PIK3C2B	UniRef100_UPI0000501722, UniRef100_UPI0003AD7FDC, UniRef100_UPI00017C34B2, UniRef100_G1SUD7, UniRef100_O00750, UniRef100_Q8BL06	VIFKCGDDLRQDMLTLQMIR	ATP	-12.1496
SNRK	UniRef100_G1TXD8, UniRef100_Q9NRH2, UniRef100_Q8VDU5, UniRef100_Q63553, UniRef100_E1BHE7, UniRef100_UPI0001CE21A9, UniRef100_UPI00048D3014, UniRef100_J9NSM5, UniRef100_G1SUU1	VAVKVIDK	Lys1	-12.6001
CDK9	UniRef100_P50750, UniRef100_Q5EAB2, UniRef100_J9NWT0, UniRef100_Q99J95	DMKAANVLITR	Lys2	-12.7029
PKD3	UniRef100_E2R428, UniRef100_Q8K1Y2, UniRef100_D4A229, UniRef100_G1SSZ9, UniRef100_UPI0000EBD322, UniRef100_O94806	NIVHCDLKPENVLLASAEPFPQVK	Lys2	-12.7784
MLKL	UniRef100_M0RDC7, UniRef100_Q8NB16, UniRef100_Q9D2Y4	LHHSEAPELHGKIR	Protein Kinase Domain	-13.1273
LYN	UniRef100_P25911, UniRef100_F1N261, UniRef100_G1SIY6, UniRef100_UPI0001CE0804, UniRef100_E2RBB8, UniRef100_Q07014, UniRef100_P07948	EGAKFPIKWTAPEAINFGCFTIK	Activation Loop	-13.8769
YES	UniRef100_A7MB57, UniRef100_Q04736, UniRef100_P07947, UniRef100_Q28923	VAIKTLKPGTMMPEAFLQEAQIMK	Lys1	-14.1185
MAP2K3	UniRef100_F1PXD3, UniRef100_P46734, UniRef100_UPI00048F76BB, UniRef100_O09110, UniRef100_B1H230, UniRef100_G1THP8, UniRef100_A4IFH7	HAQSGTIMAVKR	Lys1	-14.6534
JAK1 domain2	UniRef100_P52332, UniRef100_O35803, UniRef100_G1SQL4, UniRef100_UPI0002089A26, UniRef100_G3V9W2, UniRef100_UPI0001CE2331, UniRef100_P23458, UniRef100_UPI00005A0C3F	YDPEGDNTGEQVAVKSLKPESGGNHIADLKK	Lys1	-14.712
STLK5	UniRef100_Q7RTN6, UniRef100_Q3UUJ4, UniRef100_UPI00048F1701, UniRef100_UPI0004914ACA, UniRef100_Q7TNZ6, UniRef100_A2VE62, UniRef100_G1SLH4, UniRef100_E2RGK3, UniRef100_UPI00048C233E, UniRef100_UPI0001CE1CE7	SVKASHILISVDGK	Lys2	-14.7697
CK1g1	UniRef100_Q8BTH8, UniRef100_E2QU92, UniRef100_Q62761, UniRef100_Q9HCP0, UniRef100_E1BNW0	DVKPENFLIGR	Lys2	-15.3241
MRCKb	UniRef100_Q7TT50, UniRef100_UPI0003AD956F, UniRef100_Q7TT49, UniRef100_Q9Y5S2	NHHVHLYPWSSLDGAEGSFDIKLPETK	Other	-15.3671
CDK7	UniRef100_P50613, UniRef100_Q03147, UniRef100_G1ST86, UniRef100_E2R8R2, UniRef100_P51952	DKNTNQIVAIKK	Lys1	-15.7587
CASK	UniRef100_O70589, UniRef100_K7AHC2, UniRef100_UPI0000E0C3E2, UniRef100_Q62915, UniRef100_UPI000333A52D, UniRef100_A5D7B9, UniRef100_O14936, UniRef100_UPI00005A5C44	ETGQQFAVKIVDVAK	Lys1	-16.7914
FGFR1, FMS, PDGFRb, TYRO3	UniRef100_F1N759, UniRef100_Q06418, UniRef100_P05622, UniRef100_P07333, UniRef100_P11362, UniRef100_E2RJV2, UniRef100_A7Z067, UniRef100_P09581, UniRef100_UPI00004BC680, UniRef100_Q05030, UniRef100_Q00495, UniRef100_Q6QNF3, UniRef100_A4IFL5, UniRef100_P09619, UniRef100_P16092, UniRef100_J9JHA3, UniRef100_F1N5L4, UniRef100_Q04589, UniRef100_P55144, UniRef100_P55146	VAVKMLK	Lys1	-16.8558
CLK1	UniRef100_F6UY30, UniRef100_A6QPK8, UniRef100_D4ADG3, UniRef100_P22518, UniRef100_P49759	LTHTDLKPENILFVQSDYTEAYNPK	Lys2	-17.9921
NuaK2	UniRef100_Q8BZN4, UniRef100_Q3SX34, UniRef100_Q9H093, UniRef100_UPI0001CE2607, UniRef100_F1PEE7, UniRef100_G1SHA1, UniRef100_UPI00048D7D3E, UniRef100_UPI00048D9F23, UniRef100_Q66HE5	LVAIKSIR	Lys1	-18.07
DGKA	UniRef100_A0JN54, UniRef100_P23743, UniRef100_O88673, UniRef100_E2QW80, UniRef100_P51556	IDPVPNTHPLLVFVNPKSGGK	ATP	-21.8221
IRE1	UniRef100_UPI00017C3AE8, UniRef100_UPI00005A1B04, UniRef100_F1LSY7, UniRef100_Q9EQY0, UniRef100_O75460	DLKPHNILISMPNAHGK	Lys2	-21.8546
MAP2K5	UniRef100_Q9WVS7, UniRef100_G1SWD5, UniRef100_UPI00048BE7FA, UniRef100_J9P3W4, UniRef100_Q13163, UniRef100_UPI00048D638C, UniRef100_Q62862, UniRef100_UPI00048D5B9E, UniRef100_E1BI01, UniRef100_UPI00048BABD2, UniRef100_UPI0001CE2C3C	ILAVKVILLDITLELQK	Lys1	-22.2109
ITPK1	UniRef100_P0C0T1, UniRef100_Q13572, UniRef100_Q8BYN3, UniRef100_J9NW00, UniRef100_D3ZQM7	ESIFFNSHNVSKPESSSVLTELDKIEGVFERPSDEVIR	ATP	-52.6102
ARAF	UniRef100_P04627, UniRef100_P14056, UniRef100_E2RL20, UniRef100_C7BDX3, UniRef100_P10398, UniRef100_G1TBN2	DLKSNNIFLHEGLTVK	Lys2	-53.7368
